# Supplementary material
Source: Research Square preprint supplement (doi:10.21203/rs.3.rs-9959265/v1)
Supplement: Supplementary file 1 [file 619d023051f411ad385c708b.pdf]

**Supplementary Information for integrated photon-pair sources on periodically poled thin-film lithium tantalate**

Sakthi Sanjeev Mohanraj,<sup>1,2, a)</sup> Xiaodong Shi,<sup>3, a)</sup> Ran Yang,<sup>2</sup> Lin Zhou,<sup>1,2</sup> and Di Zhu<sup>1,2,3, b)</sup>

<sup>1)</sup>*Department of Materials Science and Engineering, National University of Singapore, Singapore 117575, Singapore*

<sup>2)</sup>*Centre for Quantum Technologies, National University of Singapore, Singapore 117543, Singapore*

<sup>3)</sup>*A\*STAR Quantum Innovation Centre (Q.InC), Agency for Science, Technology and Research (A\*STAR), Singapore 138634, Singapore*

---

<sup>a)</sup>These authors contributed equally.

<sup>b)</sup>Electronic mail: dizhu@nus.edu.sg

TABLE I. **Performance benchmark of frequency doublers in lithium tantalate**, including structure, interaction length, propagation loss, SHG efficiency, and pump wavelength.

| Ref.                 | Orientation | Structure                     | Length<br>(mm) | Loss<br>(dB/cm) | Efficiency<br>(%W <sup>-1</sup> cm <sup>-2</sup> ) | Wavelength<br>(nm) |
|----------------------|-------------|-------------------------------|----------------|-----------------|----------------------------------------------------|--------------------|
| 1                    | <i>z</i>    | bulk crystal                  | 16             |                 | 0.52                                               | 1064               |
| 2                    | <i>z</i>    | bulk crystal                  | 20             |                 | 0.17                                               | 1064               |
| 3                    | <i>z</i>    | bulk crystal                  | 40             |                 | 0.075                                              | 1064               |
| 4                    | <i>z</i>    | bulk crystal                  | 10             |                 | 1.4                                                | 1064               |
| 5                    | <i>z</i>    | bulk crystal                  | 12             |                 | 0.38                                               | 1064               |
| 6                    | <i>z</i>    | Zr-diffused<br>waveguide      | 22             | 0.3 - 0.5       | 3.5                                                | 800                |
| 7                    | <i>z</i>    | proton exchanged<br>waveguide | 1              |                 | 290                                                | 840                |
| 8                    | <i>z</i>    | proton exchanged<br>waveguide | 13             |                 | 0.4                                                | 870                |
| 9                    | <i>x</i>    | waveguide                     | 8              | 0.25            | 1290                                               | 1064               |
| 10                   | <i>z</i>    | waveguide                     | 2.5            | 0.72            | 229                                                | 1565               |
| 11                   | <i>x</i>    | waveguide                     | 10             | 0.25            | 244                                                | 1550               |
| 12                   | <i>x</i>    | waveguide                     | 7              | 0.25            | 107                                                | 1550               |
| <b>This<br/>work</b> | <i>x</i>    | <b>waveguide</b>              | <b>3</b>       | <b>2.1</b>      | <b>841</b>                                         | <b>1565</b>        |
| <b>This<br/>work</b> | <i>x</i>    | <b>microring resonator</b>    |                | <b>0.75</b>     | <b>3.9 × 10<sup>4</sup></b> <sup>a</sup>           | <b>1554</b>        |

<sup>a</sup> The unit of efficiency is %W<sup>-1</sup>

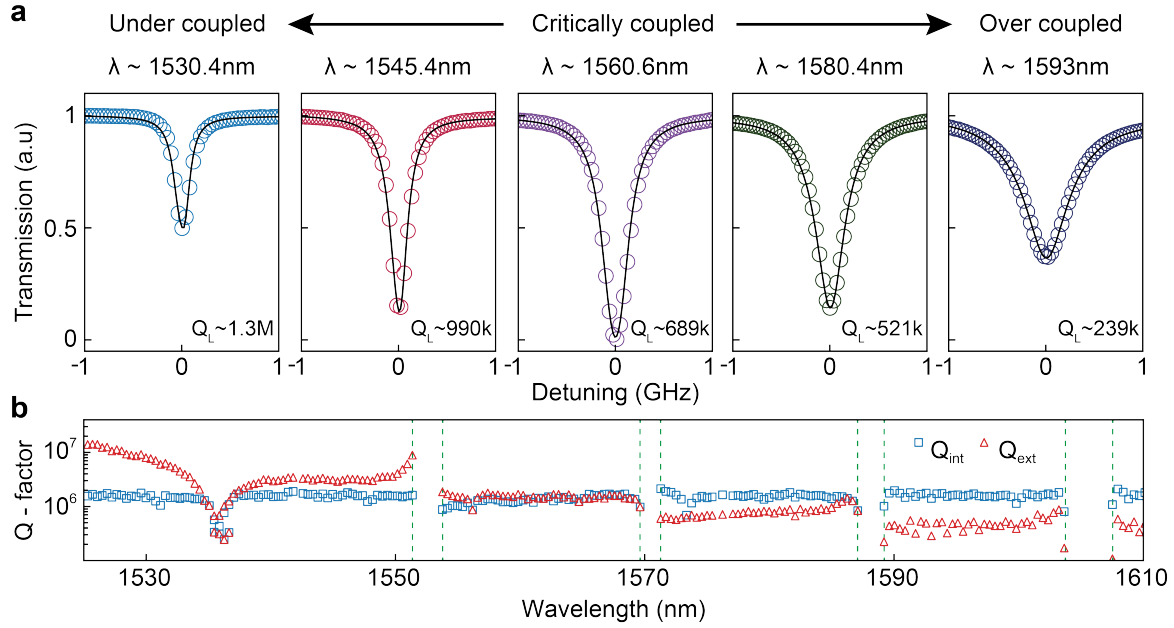

FIG. 1. **Resonance characteristics and quality factors of the microresonator.** **a**, Representative resonance transmission spectra at different wavelengths illustrating the transition from under-coupled to over-coupled regimes across the investigated spectrum. The circles represent the measured transmission data and the lines correspond to Lorentzian fits used to extract the resonance characteristics.  $Q_L$  is the loaded quality factor. **b**, Extracted intrinsic quality factor ( $Q_{\text{int}}$ ) and external quality factor ( $Q_{\text{ext}}$ ) as a function of wavelength. The green-dashed parts indicate the crossing points between  $TE_{00}$  and  $TE_{10}$ .

## REFERENCES

- <sup>1</sup>J.-P. Meyn and M. Fejer, “Tunable ultraviolet radiation by second-harmonic generation in periodically poled lithium tantalate,” *Optics letters* **22**, 1214–1216 (1997).
- <sup>2</sup>S. V. Tovstonog, S. Kurimura, I. Suzuki, K. Takeno, S. Moriwaki, N. Ohmae, N. Mio, and T. Katagai, “Thermal effects in high-power cw second harmonic generation in mg-doped stoichiometric lithium tantalate,” *Optics express* **16**, 11294–11299 (2008).
- <sup>3</sup>S. Sinha, D. S. Hum, K. E. Urbanek, Y.-w. Lee, M. J. Dignonnet, M. M. Fejer, and R. L. Byer, “Room-temperature stable generation of 19 watts of single-frequency 532-nm radiation in a periodically poled lithium tantalate crystal,” *Journal of Lightwave Technology* **26**, 3866–3871 (2008).
- <sup>4</sup>H. H. Lim, T. Katagai, S. Kurimura, T. Shimizu, K. Noguchi, N. Ohmae, N. Mio, and I. Shoji, “Thermal performance in high power shg characterized by phase-matched calorimetry,” *Optics Express* **19**, 22588–22593 (2011).
- <sup>5</sup>A. Bruner, D. Eger, and S. Ruschin, “Second-harmonic generation of green light in periodically poled stoichiometric lithium tantalate doped with magnesium,” *Journal of applied physics* **96**, 7445–7449 (2004).
- <sup>6</sup>S. Suntsov, C. Sharma, K. Hasse, and D. Kip, “Second harmonic generation into the near ultraviolet in zr-diffusion-doped lithium tantalate ridge waveguides,” *Optics Express* **33**, 16202–16209 (2025).
- <sup>7</sup>M. C. Gupta, W. Kozlovsky, and A. C. Nutt, “Second-harmonic generation in bulk and waveguided lithium tantalate with domain inversion induced by electron beam scanning,” *Applied physics letters* **64**, 3210–3212 (1994).
- <sup>8</sup>H. Ahlfeldt, J. Webjorn, and G. Arvidsson, “Periodic domain inversion and generation of blue light in lithium tantalate waveguides,” *IEEE Photonics technology letters* **3**, 638–639 (2002).
- <sup>9</sup>H. Chen, X. Zhang, Z. Ye, X. Chen, C. Huang, P. Zhan, X. Ou, S. Zhu, and X. Hu, “Continuous-wave second-harmonic generation of green light in periodically poled thin-film lithium tantalate,” *Optics Letters* **50**, 1125–1127 (2025).
- <sup>10</sup>S. Yu, M. Qi, H. Zhu, B. Zhao, J. Qian, Y. Wu, Q. Chen, and J. Lu, “Efficient and tunable frequency conversion using periodically poled thin-film lithium tantalate nanowaveguides,” *Nanophotonics* **14**, 3017–3022 (2025).
- <sup>11</sup>A. Shelton, C. Xin, K. Powell, J. Yang, S. Lu, N. Sinclair, and M. Loncar, “Robust poling and frequency conversion on thin-film periodically poled lithium tantalate,” *arXiv preprint arXiv:2504.17980* (2025).
- <sup>12</sup>N. Kuznetsov, Z. Li, and T. J. Kippenberg, “Watt-level second harmonic generation in periodically poled thin-film lithium tantalate,” *arXiv preprint arXiv:2512.07968* (2025).
